# Supplementary material for: Divergent G-protein selectivity across melanopsins from mice and humans
Source: PubMed Central journal article supplement (PMC8977054; doi:10.1242/jcs.258474), 2022-03-21
Supplement: joces-135-258474-s1.pdf [file joces-135-258474-s1.pdf]

|                        | 1          | 11         | 21          | 31          | 41           | 51          | 60    |
|------------------------|------------|------------|-------------|-------------|--------------|-------------|-------|
| sp Q9UHM6-1 hOPN4      | MNPPSGPRVP | PSPTQEPSCM | ATPAPPSWWD  | SSQSSISLGL  | RLPSISPTAP   | GTWAAAWVPL  | 60    |
| sp Q9UHM6-2 hOPN4 (v2) | MNPPSGPRVP | PSPTQEPSCM | ATPAPPSWWD  | SSQSSISLGL  | RLPSISPTAP   | GTWAAAWVPL  | 60    |
| sp Q9QXZ9-1 musOpn4L   | MDSPSGPRVL | SSLTQDPSFT | TSPALQGIWN  | GTQ-NVSVRA  | QLLSVSPPTS   | AHQAAAWVPF  | 59    |
| sp Q9QXZ9-2 musOpn4S   | MDSPSGPRVL | SSLTQDPSFT | TSPALQGIWN  | GTQ-NVSVRA  | QLLSVSPPTS   | AHQAAAWVPF  | 59    |
| h/mOpn4L Chimera       | MNPPSGPRVP | PSPTQEPSCM | ATPAPPSWWD  | SSQSSISLGL  | RLPSISPTAP   | GTWAAAWVPL  | 60    |
|                        | *:*****    | . * **:*   | ::** . *    | ::* .:* .   | .* *:*:.     | . *****:    |       |
| <b>TM1</b>             |            |            |             |             |              |             |       |
| sp Q9UHM6-1 hOPN4      | PTVDVPDHAH | YTLGTVILLV | GLTGMLGNLT  | VIYTFPCR--- | -----SR      | SLRTPANMFI  | 109   |
| sp Q9UHM6-2 hOPN4 (v2) | PTVDVPDHAH | YTLGTVILLV | GLTGMLGNLT  | VIYTFCRAVL  | RGVTVMMSQR   | SLRTPANMFI  | 120   |
| sp Q9QXZ9-1 musOpn4L   | PTVDVPDHAH | YTLGTVILLV | GLTGMLGNLT  | VIYTFPCR--- | -----NR      | GLRTPANMFI  | 108   |
| sp Q9QXZ9-2 musOpn4S   | PTVDVPDHAH | YTLGTVILLV | GLTGMLGNLT  | VIYTFPCR--- | -----NR      | GLRTPANMFI  | 108   |
| h/mOpn4L Chimera       | PTVDVPDHAH | YTLGTVILLV | GLTGMLGNLT  | VIYTFPCR--- | -----SR      | SLRTPANMFI  | 109   |
|                        | *****      | *****      | *****       | *****       |              | . * *****   |       |
| <b>TM2</b>             |            |            |             |             |              |             |       |
| sp Q9UHM6-1 hOPN4      | INLAVSDFLM | SFTQAPVFFT | SSLYKQWLFGL | ETGCEFYAFC  | GALFGISSMI   | TLTAIALDRY  | 169   |
| sp Q9UHM6-2 hOPN4 (v2) | INLAVSDFLM | SFTQAPVFFT | SSLYKQWLFGL | ETGCEFYAFC  | GALFGISSMI   | TLTAIALDRY  | 180   |
| sp Q9QXZ9-1 musOpn4L   | INLAVSDFLM | SVTQAPVFFA | SSLYKKWLFGL | ETGCEFYAFC  | GAVFGITSMI   | TLTAIAMDRY  | 168   |
| sp Q9QXZ9-2 musOpn4S   | INLAVSDFLM | SVTQAPVFFA | SSLYKKWLFGL | ETGCEFYAFC  | GAVFGITSMI   | TLTAIAMDRY  | 168   |
| h/mOpn4L Chimera       | INLAVSDFLM | SFTQAPVFFT | SSLYKQWLFGL | ETGCEFYAFC  | GALFGISSMI   | TLTAIALDRY  | 169   |
|                        | *****      | *.*****:   | *****:****  | *****       | **:*:*:*     | *****:***   |       |
| <b>TM3</b>             |            |            |             |             |              |             |       |
| sp Q9UHM6-1 hOPN4      | INLAVSDFLM | SFTQAPVFFT | SSLYKQWLFGL | ETGCEFYAFC  | GALFGISSMI   | TLTAIALDRY  | 169   |
| sp Q9UHM6-2 hOPN4 (v2) | INLAVSDFLM | SFTQAPVFFT | SSLYKQWLFGL | ETGCEFYAFC  | GALFGISSMI   | TLTAIALDRY  | 180   |
| sp Q9QXZ9-1 musOpn4L   | INLAVSDFLM | SVTQAPVFFA | SSLYKKWLFGL | ETGCEFYAFC  | GAVFGITSMI   | TLTAIAMDRY  | 168   |
| sp Q9QXZ9-2 musOpn4S   | INLAVSDFLM | SVTQAPVFFA | SSLYKKWLFGL | ETGCEFYAFC  | GAVFGITSMI   | TLTAIAMDRY  | 168   |
| h/mOpn4L Chimera       | INLAVSDFLM | SFTQAPVFFT | SSLYKQWLFGL | ETGCEFYAFC  | GALFGISSMI   | TLTAIALDRY  | 169   |
|                        | *****      | *.*****:   | *****:****  | *****       | **:*:*:*     | *****:***   |       |
| <b>TM4</b>             |            |            |             |             |              |             |       |
| sp Q9UHM6-1 hOPN4      | LVITRPLATF | GVASKRRAAF | VLLGVWLYAL  | AWSLPPFFGW  | SAYVPEGLLT   | SCSWDYSMFT  | 229   |
| sp Q9UHM6-2 hOPN4 (v2) | LVITRPLATF | GVASKRRAAF | VLLGVWLYAL  | AWSLPPFFGW  | SAYVPEGLLT   | SCSWDYSMFT  | 240   |
| sp Q9QXZ9-1 musOpn4L   | LVITRPLATI | GRGSKRRAL  | VLLGVWLYAL  | AWSLPPFFGW  | SAYVPEGLLT   | SCSWDYMTFT  | 228   |
| sp Q9QXZ9-2 musOpn4S   | LVITRPLATI | GRGSKRRAL  | VLLGVWLYAL  | AWSLPPFFGW  | SAYVPEGLLT   | SCSWDYMTFT  | 228   |
| h/mOpn4L Chimera       | LVITRPLATF | GVASKRRAAF | VLLGVWLYAL  | AWSLPPFFGW  | SAYVPEGLLT   | SCSWDYSMFT  | 229   |
|                        | *****:     | *.*****:   | *****       | *****       | *****        | *****:      | **    |
| <b>TM5</b>             |            |            |             |             |              |             |       |
| sp Q9UHM6-1 hOPN4      | PAVRAYTMLL | CCFVFFLPLL | IIICYIFIF   | RAIRETGRAL  | QTFGACKGNG   | ES-LWQR---  | 285   |
| sp Q9UHM6-2 hOPN4 (v2) | PAVRAYTMLL | CCFVFFLPLL | IIICYIFIF   | RAIRETGRAL  | QTFGACKGNG   | ES-LWQR---  | 296   |
| sp Q9QXZ9-1 musOpn4L   | PQVRAYTMLL | FCFVFFLPLL | IIIFCYIFIF  | RAIRETGR--  | ----ACEGCG   | ESPLRQRQW   | 282   |
| sp Q9QXZ9-2 musOpn4S   | PQVRAYTMLL | FCFVFFLPLL | IIIFCYIFIF  | RAIRETGR--  | ----ACEGCG   | ESPLRQRQW   | 282   |
| h/mOpn4L Chimera       | PAVRAYTMLL | CCFVFFLPLL | IIICYIFIF   | RAIRETGRAL  | QTFGACKGNG   | ES-LWQR---  | 285   |
|                        | *****      | *****      | ***:*****   | *****       | **:* * * * * |             |       |
| <b>TM6</b>             |            |            |             |             |              |             |       |
| sp Q9UHM6-1 hOPN4      | QRLQSECKMA | KIMLLVILLF | VLSWAPYSAV  | ALVAFAGYAH  | VLTPYMSSVP   | AVIAKASAIH  | 345   |
| sp Q9UHM6-2 hOPN4 (v2) | QRLQSECKMA | KIMLLVILLF | VLSWAPYSAV  | ALVAFAGYAH  | VLTPYMSSVP   | AVIAKASAIH  | 356   |
| sp Q9QXZ9-1 musOpn4L   | QRLQSEWKMA | KVALIVILLF | VLSWAPYSTV  | ALVAFAGYSH  | ILTPYMSSVP   | AVIAKASAIH  | 342   |
| sp Q9QXZ9-2 musOpn4S   | QRLQSEWKMA | KVALIVILLF | VLSWAPYSTV  | ALVAFAGYSH  | ILTPYMSSVP   | AVIAKASAIH  | 342   |
| h/mOpn4L Chimera       | QRLQSECKMA | KIMLLVILLF | VLSWAPYSAV  | ALVAFAGYAH  | VLTPYMSSVP   | AVIAKASAIH  | 345   |
|                        | *****      | ***        | *:*****     | *****:      | *****:       | *****       | ***** |
| <b>H8</b>              |            |            |             |             |              |             |       |
| sp Q9UHM6-1 hOPN4      | NPIIYAIHP  | KYRVAIAQHL | PCLGVLLGVS  | RRHSRPYPSY  | RSTHRSTLTS   | HTSNLSWISI  | 405   |
| sp Q9UHM6-2 hOPN4 (v2) | NPIIYAIHP  | KYRVAIAQHL | PCLGVLLGVS  | RRHSRPYPSY  | RSTHRSTLTS   | HTSNLSWISI  | 416   |
| sp Q9QXZ9-1 musOpn4L   | NPIIYAIHP  | KYRVAIAQHL | PCLGVLLGVS  | GQRSHPSLSY  | RSTHRSTLSS   | QSSDLSWISG  | 402   |
| sp Q9QXZ9-2 musOpn4S   | NPIIYAIHP  | KYRVAIAQHL | PCLGVLLGVS  | GQRSHPSLSY  | RSTHRSTLSS   | QSSDLSWISG  | 402   |
| h/mOpn4L Chimera       | NPIIYAIHP  | KYRVAIAQHL | PCLGVLLGVS  | GQRSHPSLSY  | RSTHRSTLSS   | QSSDLSWISG  | 405   |
|                        | *****      | *****      | *****       | ::*:* *     | *****:       | ::*:*:***   |       |
| <b>C-TERM</b>          |            |            |             |             |              |             |       |
| sp Q9UHM6-1 hOPN4      | RRRQESLGSE | SEVGWTHMEA | AAVWGAAQQA  | NGRSLYGQGL  | EDLEAKAPPR   | PQGHEAETPG  | 465   |
| sp Q9UHM6-2 hOPN4 (v2) | RRRQESLGSE | SEVGWTHMEA | AAVWGAAQQA  | NGRSLYGQGL  | EDLEAKAPPR   | PQGHEAETPG  | 466   |
| sp Q9QXZ9-1 musOpn4L   | RKRQESLGSE | SEVGWTDDET | TAAWGAAQQA  | SGQSFCSQNL  | EDGELKASSS   | PQVQRSKTPK  | 462   |
| sp Q9QXZ9-2 musOpn4S   | RKRQESLGSE | SEVGWTDDET | TAAWGAAQQA  | SGQSFCSQNL  | EDGELKASSS   | PQTK-----   | 456   |
| h/mOpn4L Chimera       | RKRQESLGSE | SEVGWTDDET | TAAWGAAQQA  | SGQSFCSQNL  | EDGELKASSS   | PQVQRSKTPK  | 465   |
|                        | *:*****    | *****      | *.*****     | .*:* .:*    | ** * * * .   | ** :        |       |
| <b>TM7</b>             |            |            |             |             |              |             |       |
| sp Q9UHM6-1 hOPN4      | -----      | KTKGLIPSQD | PR-----     | -----       | -----        | -----M      | 478   |
| sp Q9UHM6-2 hOPN4 (v2) | -----      | KTKGLIPSQD | PR-----     | -----       | -----        | -----M      | 489   |
| sp Q9QXZ9-1 musOpn4L   | VPGFSTCRPM | KGQGARPSSL | RGDQKGRILAV | CTGLSECPHP  | HTSQFPLAFL   | EDDVTLRHLIM | 522   |
| sp Q9QXZ9-2 musOpn4S   | -----      | ---GHLPSLD | LG-----     | -----       | -----        | -----M      | 466   |
| h/mOpn4L Chimera       | VPGFSTCRPM | KGQGARPSSL | RGDQKGRILAV | CTGLSECPHP  | HTSQFPLAFL   | EDDVTLRHLIM | 525   |
|                        |            | * **       |             |             |              | *           |       |

**Fig. S1. Aligned amino acid sequences of hOPN4 and musOpn4 isoforms**

Amino acid sequences of hOPN4 (Q9UHM6-1), hOPN4(v2)(Q9UHM6-2), musOpn4L (Q9QXZ9-1), musOpn4S (Q9QXZ9-2) and h/musOpn4L chimera. Sequences aligned using L-INS-I in MAFFT (v7.475) (Kato and Standley, 2013). Transmembrane helices indicated in grey. Helix 8 indicated in dark grey. C-terminal tail indicated in blue. "\*" indicates positions with fully conserved residue, ":" indicates strongly similar properties between residues, "." Indicates weakly similar properties between residues.

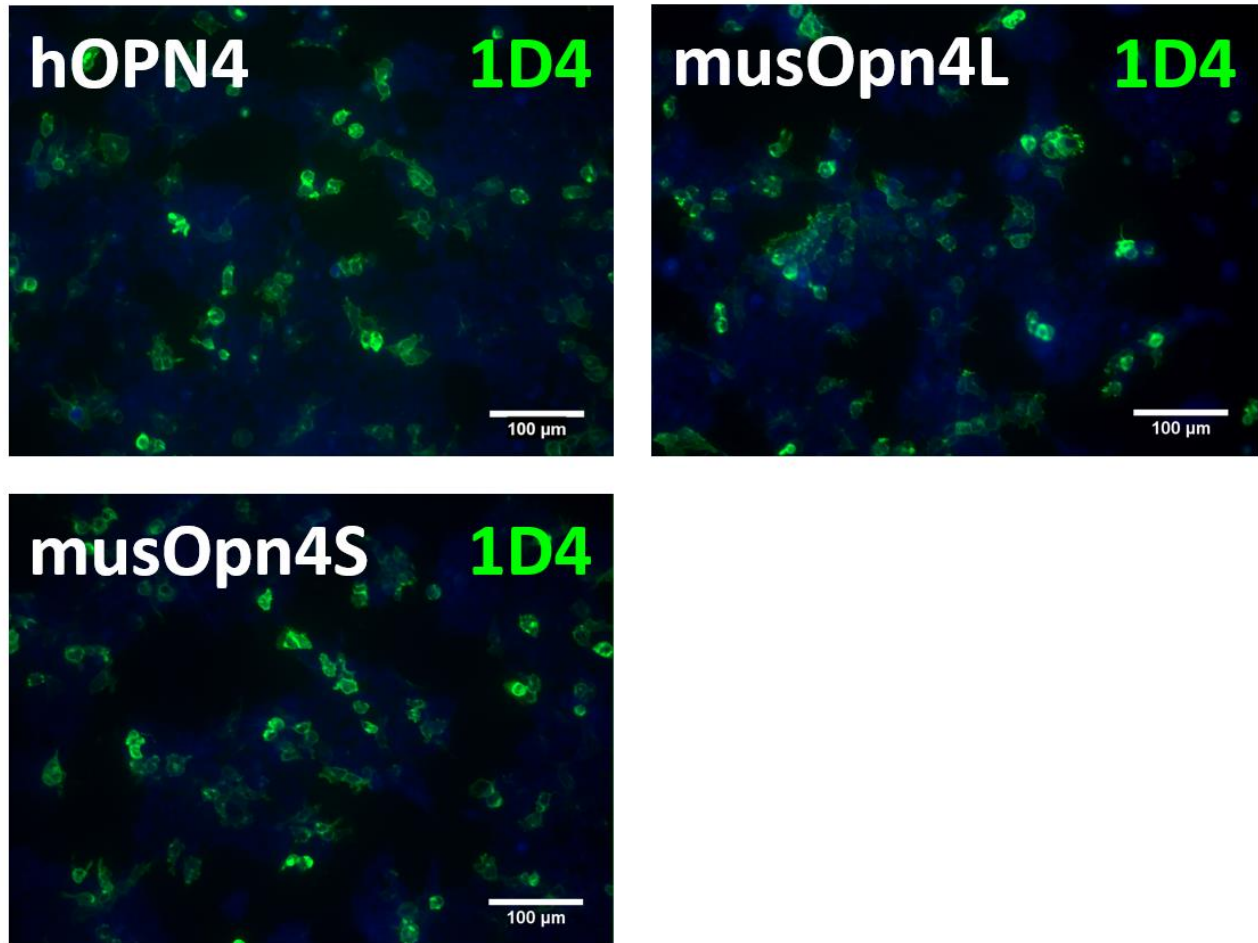

**Fig. S2. Melanopsin expression in HEK293 cells** Immunocytochemistry photomicrograph showing expression of hOPN4, musOpn4L, and musOpn4S via staining for 1D4 tag in HEK293 cells (in green). All opsins are expressed well and in cell membranes of HEK293 cells (nuclei stained with DAPI, in blue). Scale bar = 100μM.
